# Supplementary material
Source: Springer Nature journal article supplement (https://www.springermedizin.de/resource/supplementary/12967_2011_731_MOESM5_ESM.pdf/9577388)
Supplement: MOESM5 [file 9577388]

**A**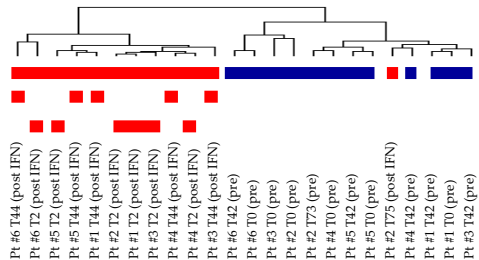**B**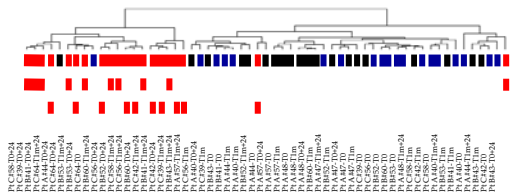

 Pre Tx  
 Post Tx (Vaccine + IFN $\alpha$ )  
 Pre and Post Group A (HBV Vaccine + *Placebo*)

**C**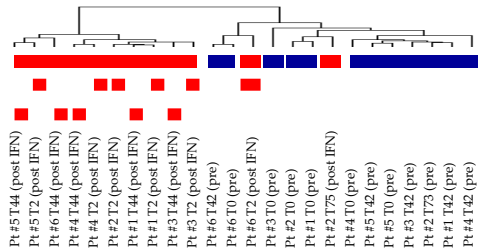

 T2: Post Melanoma vaccine+ IFN $\alpha$  1 Cycle  
 T44: Post Melanoma vaccine + IFN $\alpha$  4 Cycle

**D**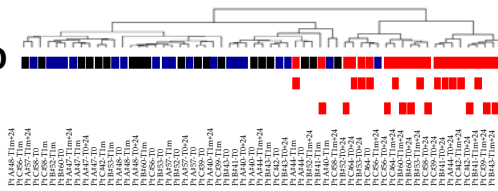

 T0+24h: Post HBV Vaccine + 3MU IFN $\alpha$  1 Cycle  
 T1m+24h: Post HBV Vaccine +3MU IFN $\alpha$  2<sup>nd</sup> Cycle
